# Supplementary material for: Links between nocturnal hypoxia and cognitive function in breast cancer
Source: Research Square preprint supplement (doi:10.21203/rs.3.rs-6016528/v1), 2025-10-29
Supplement: Supplementary file 1 [file 98d3064d9d250674cd052dac.docx]

**Supplementary Online Content 1**

**Cognitive composite scores**

To minimize the issue of multiple statistical testing, we computed composite scores for each cognitive domain. Performance on various cognitive tests were z-transformed and averaged. Before averaging, Z-scores derived from reaction times, percentages/number of errors were reversed so that increasing values always indicated better performance.

- Executive function composite score
- Trail Making Test (TMT) using the following score calculation [TMTB time – TMTA time]/TMTA time
- Score of accuracy in part 1 of the Zoo Map Test
- Stroop test using the following score calculation [Interference time – Color time]/ Color time
- Processing speed composite score
- Time to perform the TMT part A.
- Time to complete the color card of the Stroop test (naming condition).
- Working memory
- Digit span forward of the WAIS III
- Digit span backward of the WAIS III
- Number of correct trials of the Binding Task
- Episodic memory
- Sum of the three immediate free recall scores of the RL/RI-16, a French adaptation of the Grober and Buschke’s procedure.
- Sum of the three immediate total recall scores of the RL/RI-16 (free and cued)
- Delayed total recall scores of the RL/RI-16

**Table S1. Comparison of raw neuropsychological test scores between HCs and BC patients**

|  | HCs (n=21) | BCs (n=35) | *p*-value |
| --- | --- | --- | --- |
| **Processing Speed** | | | |
| TMT-A completion time (seconds) | 34.52 ± 8.05 | 37.43 ± 10.48 | 0.24 |
| Stroop Color completion time (seconds) | 57.28 ± 7.04 | 61.2 ± 9.74 | 0.15 |
| **Executive functions** | | | |
| *Flexibility* | | | |
| TMT (B-A/A) ratio | 1.66 ± 1.05 | 1.76 ± 1.13 | 0.72 |
| TMT-B completion time (seconds) | 92.66 ± 51.38 | 98.8 ± 38.61 | 0.22 |
| *Inhibition* | | | |
| Stroop Word-Color Test “WC-C/C” ratio | 0.88 ± 0.42 | 1.07 ± 0.43 | 0.18 |
| Stroop Word completion time (seconds) | 43.28 ± 4.47 | 44.65 ± 7.73 | 0.64 |
| Stroop Interference time (seconds) | 107.53 ± 24.98 | 125.74 ± 26.29 | **0.02** |
| *Planning* | | | |
| Profile score for Part 1 of the Zoo test | 5.52 ± 2.6 | 5.85 ± 2.56 | 0.61 |
| **Working Memory** | | | |
| Digit Span forward | 6.28 ± 1.42 | 5.8 ± 1.32 | 0.27 |
| Digit Span backward | 4.66 ± 1.43 | 4.65 ± 1.21 | 0.83 |
| Binding task | 15 ± 2.86 | 14.11 ± 3.19 | 0.41 |
| **Episodic Memory** | | | |
| Sum of three immediate free recall scores | 37.24 ± 4.26 | 34.68 ± 5.05 | **0.035** |
| Sum of three immediate total recall scores | 47.28 ± 1.38 | 47.2 ± 1.18 | 0.42 |
| Delayed free recall scores | 14.15 ± 1.49 | 13.25 ± 1.93 | 0.09 |
| Delayed total recall scores | 15.9 ± 0.43 | 15.03 ± 3.16 | 0.19 |

*p*-values<0.05 are in bold

**Table S2. Outcomes of nocturnal hypoxia and cognitive performance (mean ± SD) in ET + RT versus RT alone**

| Nocturnal Hypoxia Indices (z-scores) | ET + RT (n=18) | RT (n=17) | *p*-value |
| --- | --- | --- | --- |
| Oxygen Desaturation Index ≥3% (ODI ≥3%) | 0.34 ± 1.19 | 0.026 ± 0.73 | 0.51 |
| Total Sleep Time with Oxygen Saturation ≤90% (TST90%) | -0.04 ± 0.38 | -0.09 ± 0.26 | 0.68 |
| Minimal Oxygen Saturation (SpO2) | -0.75 ± 1.28 | -0.68 ± 1.35 | 0.79 |
| Nocturnal hypoxia composite score | -0.15 ± 0.32 | -0.25 ± 0.33 | 0.33 |
| Cognitive Composite scores | **ET + RT (n=18)** | **RT (n=17)** | ***p*-value** |
| Executive function | -0.24 ± 0.62 | -0.14 ± 0.81 | 0.44 |
| Processing Speed | -0.79 ± 1.17 | -0.11 ± 0.94 | 0.12 |
| Working Memory | -0.30 ± 0.66 | -0.13 ± 0.87 | 0.58 |
| Episodic Memory | -1.51 ± 2.63 | -0.08 ± 0.55 | 0.06 |

**Note.** ET: Endocrine Therapy; RT: Radiotherapy. Statistical significance is set at *p*< 0.05.
